# Supplementary material for: Coral Productivity Is Co-Limited by Bicarbonate and Ammonium Availability
Source: Microorganisms. 2020 Apr 28;8(5):640. doi: 10.3390/microorganisms8050640 (PMC7285240; doi:10.3390/microorganisms8050640)
Supplement: Supplementary file 1 [file microorganisms-08-00640-s001.pdf]

## Supporting information

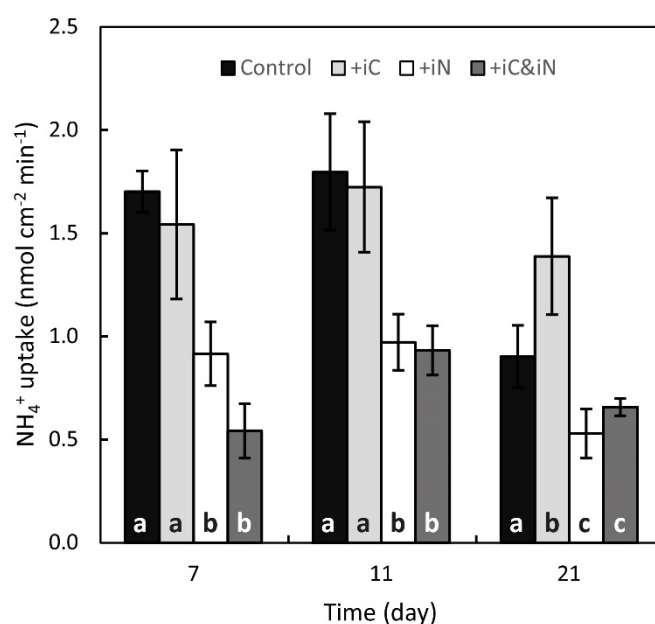

**Figure S1. Evolution of the ammonium uptake by *S. pistillata* nubbins** exposed for 3 weeks to natural seawater (control) and to seawater enriched with 6 mM  $\text{HCO}_3^-$  (+iC) or 4  $\mu\text{M}$   $\text{NH}_4^+$  (+iN) or both (+iC & iN). Data are presented as mean  $\pm$  SD ( $n = 6$ ). Different letters indicate statistically significant differences between each treatment for one time point ( $P < 0.05$ ).

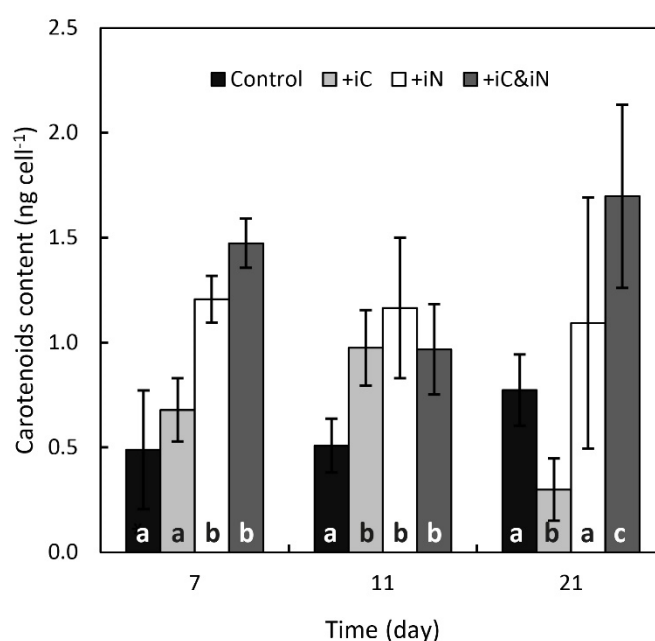

**Figure S2. Evolution of the carotenoids cellular concentrations (peridinin + xanthophylls +  $\beta$ -carotene; ng cell<sup>-1</sup>) in the endosymbionts of the coral *S. pistillata*** exposed for 3 weeks to natural seawater (control) and to seawater enriched with 6 mM  $\text{HCO}_3^-$  (+iC) or 4  $\mu\text{M}$   $\text{NH}_4^+$  (+iN) or both (+iC & iN). Data are presented as mean  $\pm$  SD ( $n = 6$ ). Different letters indicate statistically significant differences between each treatment for one time point ( $P < 0.05$ ).

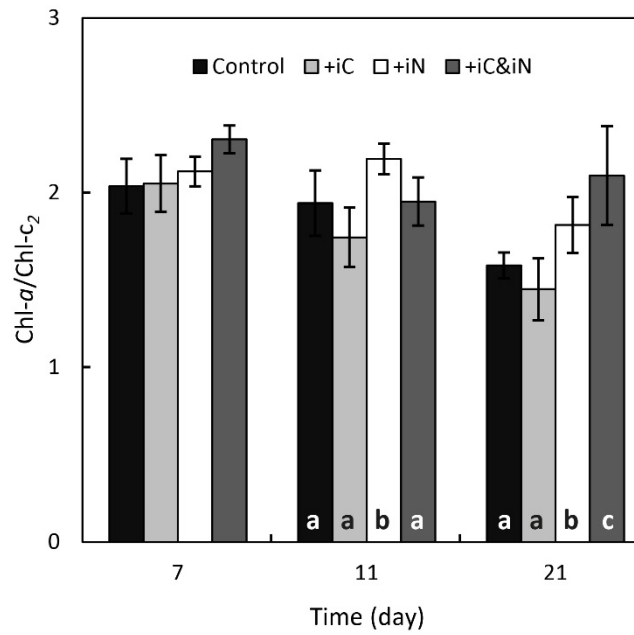

**Figure S3. Evolution of the chl-*a*/*c*<sub>2</sub> ratio in endosymbionts of the coral *S. pistillata*** exposed for 3 weeks to natural seawater (control) and to seawater enriched with 6 mM HCO<sub>3</sub><sup>-</sup> (+iC) or 4 μM NH<sub>4</sub><sup>+</sup> (+iN) or both (+iC & iN). Data are presented as mean ± SD (n = 6). Different letters indicate statistically significant differences between each treatment for one time point (P < 0.05).

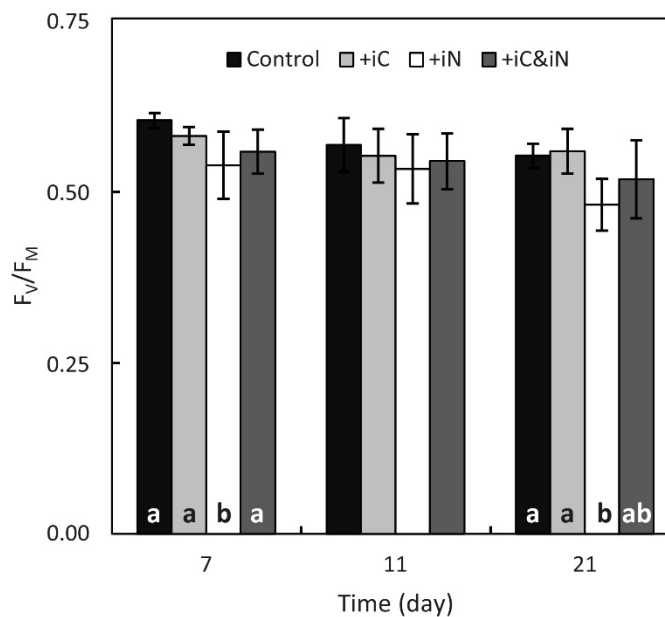

**Figure S4. Evolution of the maximal photochemical quantum yield (F<sub>v</sub>/F<sub>m</sub>) of *S. pistillata*** exposed for 3 weeks to natural seawater (control) and to seawater enriched with 6 mM HCO<sub>3</sub><sup>-</sup> (+iC) or 4 μM NH<sub>4</sub><sup>+</sup> (+iN) or both (+iC & iN). Data are presented as mean ± SD (n = 6). Different letters indicate statistically significant differences between each treatment for one time point (P < 0.05).

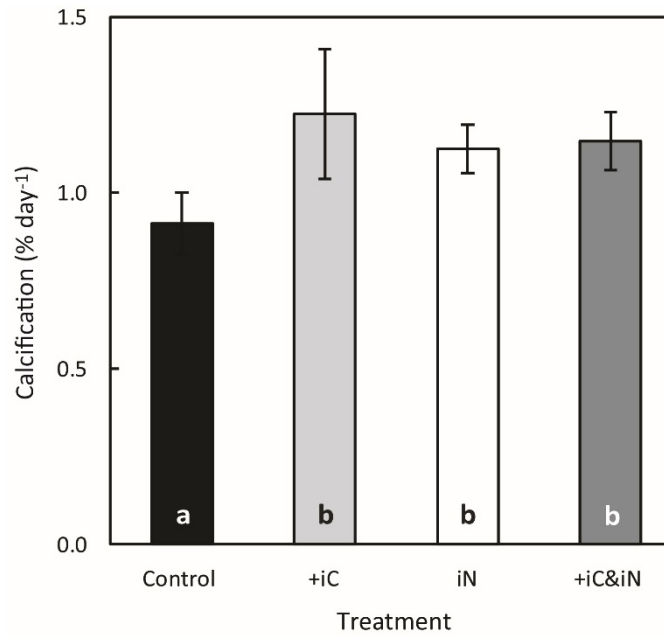

**Figure S5.** Evolution of the calcification rates of *S. pistillata* exposed for 3 weeks to natural seawater (control) and to seawater enriched with 6 mM  $\text{HCO}_3^-$  (+iC) or 4  $\mu\text{M}$   $\text{NH}_4^+$  (+iN) or both (+iC & iN). Data are presented as mean  $\pm$  SD (n = 6). Different letters indicate statistically significant differences between each treatment for one time point ( $P < 0.05$ ).

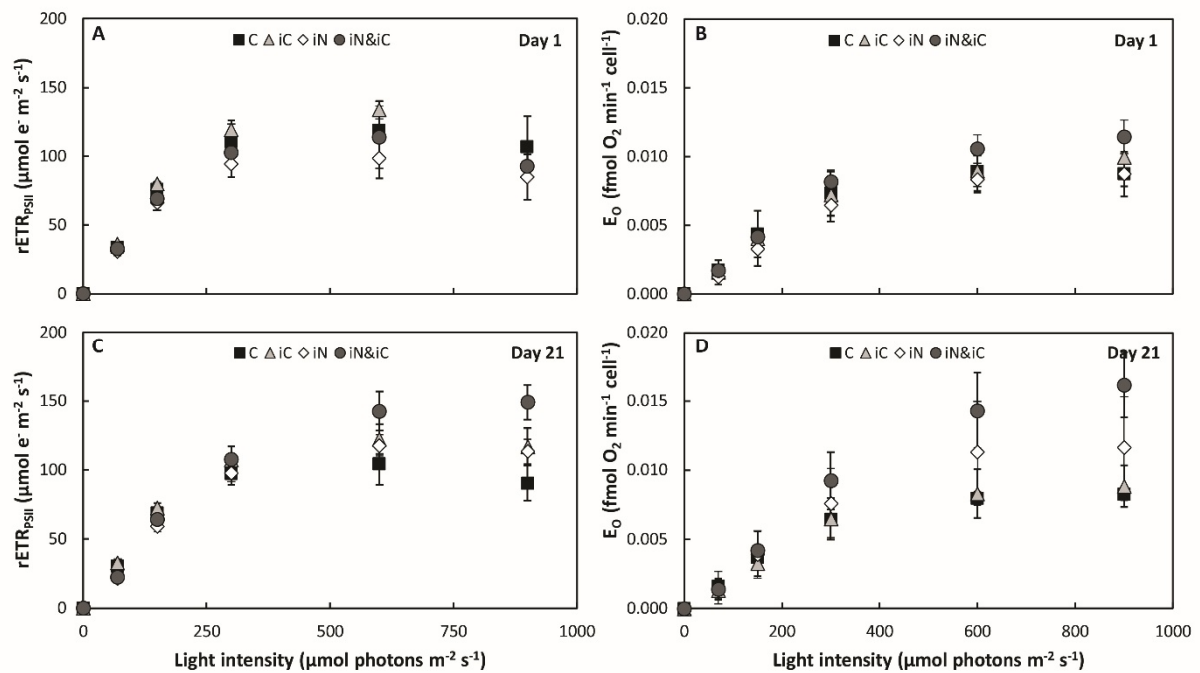

**Figure S6.** Relative electron transport rate through PSII ( $\text{rETR}_{\text{PSII}}$ ;  $\mu\text{mol e}^- \text{m}^{-2} \text{s}^{-1}$ ; A & C) and gross  $\text{O}_2$  evolution by PSII ( $E_0$ ;  $\text{fmol O}_2 \text{min}^{-1} \text{cell}^{-1}$ ; B & D) at steady-state photosynthesis in *S. pistillata*, after 1 day and 3 weeks of exposure to natural seawater (control) and to seawater enriched with 6 mM  $\text{HCO}_3^-$  (+iC) or 4  $\mu\text{M}$   $\text{NH}_4^+$  (+iN) or both (+iC & iN). Measurements were conducted at 0, 70, 150, 300, 600 and 900  $\mu\text{mol photons m}^{-2} \text{s}^{-1}$  and data are presented as mean  $\pm$  SD (n = 6).

**Table S1. Mean values of the physiological parameters measured at the beginning of the experiment on *S. pistillata* nubbins (n = 24)**

| Measured parameters                    | (units)                                                  | Mean $\pm$ SD      |
|----------------------------------------|----------------------------------------------------------|--------------------|
| <b><i>Symbiodinium</i> density</b>     | ( $\times 10^6$ cells $\text{cm}^{-2}$ )                 | $2.43 \pm 0.21$    |
| <b>EO*</b>                             | ( $\mu\text{mol O}_2 \text{ min}^{-1} \text{ cm}^{-2}$ ) | $0.023 \pm 0.004$  |
| <b>Chlorophyll <i>a</i>+ <i>c2</i></b> | ( $\mu\text{g cm}^{-2}$ )                                | $6.61 \pm 2.24$    |
| <b>Respiration</b>                     | ( $\mu\text{mol O}_2 \text{ s}^{-1} \text{ cm}^{-2}$ )   | $-0.007 \pm 0.001$ |
| <b>Chl-<i>a</i>/Chl-<i>c2</i></b>      |                                                          | $2.04 \pm 2.00$    |
| <b>F<sub>v</sub>/F<sub>M</sub></b>     |                                                          | $0.58 \pm 0.03$    |
| <b>rETR<sub>PSII</sub>*</b>            | ( $\mu\text{mol e}^- \text{ m}^{-2} \text{ s}^{-1}$ )    | $116 \pm 17$       |
| <b>NPQ*</b>                            |                                                          | $2.94 \pm 0.16$    |
| <b>O<sub>2</sub>-dependent rETR</b>    | (%)                                                      | $0.75 \pm 0.08$    |

\* These photosynthetic parameters were measured at a light intensity of  $600 \mu\text{mol photons m}^{-2} \text{ s}^{-1}$
